Article

# Dynamical Task Switching in Cellular Computers

Angel Goñi-Moreno<sup>1,\*</sup>, Fernando de la Cruz<sup>2</sup>, Alfonso Rodríguez-Patón<sup>3</sup> and Martyn Amos<sup>4</sup>

<sup>1</sup> School of Computing, Newcastle University, UK.

<sup>2</sup> Instituto de Biomedicina y Biotecnología de Cantabria, Universidad de Cantabria, Spain.

<sup>3</sup> Departamento de Inteligencia Artificial, Universidad Politécnica de Madrid, Spain.

<sup>4</sup> Department of Computer and Information Sciences, Northumbria University, UK.

\* Correspondence: [angel.goni-moreno@newcastle.ac.uk](mailto:angel.goni-moreno@newcastle.ac.uk)

**Abstract:** We present a scheme for implementing a version of task switching in engineered bacteria, based on the manipulation of plasmid copy numbers. Our method allows for the embedding of multiple computations in a cellular population, whilst minimising resource usage inefficiency. We describe the results of computational simulations of our model, and discuss the potential for future work in this area.

**Keywords:** Synthetic biology; cellular computing; plasmids.

---

## 1. Introduction

Synthetic biology [1,2] is often broadly defined as the *rational engineering* of biological systems, with the aim of implementing novel computational functions in living organisms. Cells such as bacteria may host engineered networks of regulatory proteins - so-called *genetic circuits* - that sense inputs, perform processing, and generate outputs according to human-defined rules.

These artificial cellular computers are often necessarily *single-purpose*, in that they perform one well-defined task, such as the production of drug precursors [3] or the detection of environmental pollutants [4]. Interestingly, the representation of information by physical properties of a biological system (such as levels of gene expression) immediately suggests a parallel with *analogue computers* [5,6], which also used physical quantities (such as hydraulic pressure or the elasticity of a spring) to model specific problems. Importantly, analogue computers were also geared towards specific applications (such as calculating bomb trajectories), and this did not limit their usefulness.

However, we are also interested in the possibility of engineering biological systems that are capable of *task switching* (that is, moving between a number of pre-programmed behaviours (or “tasks”) according to specific rules or signals). This allows for the possibility of embedding different tasks into a cellular population, but essentially performing dynamical resource allocation to ensure that the cells do not become metabolically over-burdened. We might compare this to the computer memory management strategy of “paging”, whereby inactive processes are moved from (limited) main memory onto secondary storage (such as a disk). In our model, active processes are represented by plasmids which exist in high numbers, and plasmids that are relatively few in number are considered to be “inactive”.

Here, we present a system in which multiple genetic circuits coexist, and control strategies select which one is functional (i.e., which task *runs*) at a given time. Our method is based on controlling the replication of *plasmids*, which are small DNA molecules which exist (and may be replicated inside) the cell independently of the main chromosomal material.

The rest of this paper is organized as follows: in Section 2 we provide some background to and motivation for our proposed method. In Section 3 we then present our main experimental results, describing our methodology in Section 4. We then conclude in Section 5 with a discussion of our findings, and propose future work.

## 36 2. Background

37 Synthetic biology is a rapidly-growing scientific area, with applications in many significant  
38 domains, including health, energy, and the environment [7]. One branch of synthetic biology, which  
39 we call “cellular computing” [8], is specifically concerned with the construction of computational  
40 parts and devices using living cells [9,10]. These implementations include Boolean logic gates [11,12],  
41 switches [13], oscillators [14], and counters [15].

42 A fundamental tool in genetic engineering (and, thus, synthetic biology) are *plasmids*; these are  
43 small circular DNA molecules used to introduce new genetic material into bacteria and other cells  
44 [16–18]. Typically, new genetic circuits are encoded as a number of genes, the sequences of which are  
45 then synthesised and inserted into the plasmid. Plasmids may also naturally be moved *between* cells  
46 via *conjugation*, facilitating a process known as *Horizontal Gene Transfer* (HGT) [19,20].

47 Horizontal gene transfer via conjugation has previously been proposed as a useful mechanism  
48 for performing computations [21], by using plasmids to transmit *signals* between cells. Here, we  
49 instead embed entire computational circuits within individual plasmids [12], and then manipulate  
50 their properties to dynamically switch between them. This allows us to potentially run a number of  
51 different “programs” within the cell population, whilst ensuring that only active processes consume  
52 scarce system resources. This is the most important aspect of our proposal; while it is, in principle,  
53 possible to engineer multiple functional circuits into bacteria (and switch between them), in practice  
54 this is difficult to achieve, and inactive circuits place a significant metabolic overhead on the hosts.  
55 By dynamically switching between active circuits, and having *only active* circuits present in the host  
56 bacteria in significant numbers, we allow for flexible computational behaviour, whilst minimising the  
57 burden on the hosts. In the next Section, we describe our model in detail.

### 58 2.1. Our task switching model

59 In previous work, we showed how individual cells may be engineered to exhibit different  
60 computational behaviours according to the type of input received [22]. This essentially “flipped”  
61 a *single* genetic circuit between Boolean NAND and NOR, depending on input thresholds. Here, we  
62 maintain *multiple* circuits within a *population* of cells, and (de)activate them according to need.

63 A high-level description of our model is shown in Figure 1A. We have two basic levels of control;  
64 the lowest level concerns individual genetic circuits encoded in plasmids, and the higher (control)  
65 level switches *between* these circuits (by manipulating the population dynamics of the plasmid pool).  
66 We focus mainly on this control level, as the embedding of computational circuits in plasmids is  
67 well-understood and standard [12].

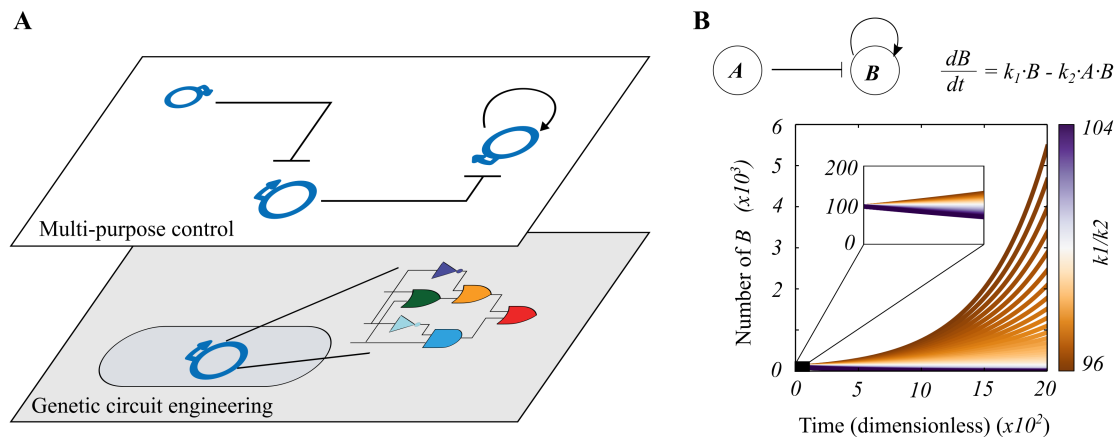

**Figure 1.** Overall design for a multi-purpose cellular computer. **A.** The bottom control level encodes a single genetic circuit in a plasmid vector, which executes a single “program”. The top control level handles switching strategies for regulating the numbers of such plasmids in a cellular population. This is done via inhibiting plasmid replication or by promoting plasmid horizontal transfer (i.e. extra replication). **B.** Deterministic analysis of a two-plasmid system (where plasmid A represses the replication of B, which, in turn, replicates via positive feedback) shows that the system is highly unstable, i.e., plasmid B tends to either increase indefinitely or disappear.

68 Plasmid *replication* occurs using the host cell’s DNA replication machinery; plasmids contain  
 69 sequences known as *origins of replication (ori)*, which “instruct” the host cell to initiate its  
 70 own replication. Importantly, a plasmid *ori* sequence may be activated or deactivated by  
 71 initiator/repressor proteins that bind to it, thus turning on or off the replication of that plasmid  
 72 [23]. In turn, initiator/repressor proteins may be expressed by genes in other plasmids, allowing one  
 73 plasmid to effectively turn another on or off. Plasmids *propagate* in a system through either *horizontal*  
 74 transfer via cell-cell conjugation, or *vertically*, when a cell divides into two daughter cells (Figure  
 75 2A. Plasmids that are being repressed are not transmitted vertically, but may still be transferred  
 76 horizontally between siblings. Two specific attributes of plasmids are of direct interest; their *copy*  
 77 *number*, and their *stability*. Copy number refers to the expected number of instances of a specific  
 78 plasmid within a single host cell, and this may be “low” (15-20 copies per cell), “medium” (20-100  
 79 copies per cell) or “high” (>500 copies per cell). Engineered plasmids may be “set” to any preselected  
 80 copy number, but there is an attendant trade-off: the higher the copy number, the higher the metabolic  
 81 burden on the cell. Plasmid stability [24] exists when, at cell division, each daughter cell receives at  
 82 least one copy of the plasmid.

83 In the next Section, we describe the results of modelling and simulation experiments to  
 84 investigate the properties and behaviour of systems constructed within our scheme.

### 85 3. Results

#### 86 *Continuous modelling*

87 In Figure 1B, we show the behaviour of a two-plasmid system, modelled using ordinary  
 88 differential equations, in which plasmid A represses (i.e., “turns off”) the replication of plasmid B,  
 89 which, in turn, replicates via positive feedback. We note a fragile equilibrium for the stability of  
 90 plasmid B; there is only one scenario,  $k_1/k_2 = \text{number of A}$  (100) where the copy number of B does not  
 91 either increase indefinitely or decrease to zero. This highlights the need for a *stabilisation* mechanism  
 92 in such systems, which we describe below.

93 *Discrete simulation*

94 In Figure 2 we show the results of *discrete* simulation of a population of cells containing two  
 95 plasmids, A and B. Each plasmid's computational "task" is not specified, since we focus here on the  
 96 dynamics of copy numbers over time (red for plasmid A, and green for plasmid B). We emphasise  
 97 the fundamental principle that plasmids that are repressed are not spread vertically (through cell  
 98 division), but may still propagate horizontally (Figure 2A). The significance of this is shown in Figure  
 99 2B; for an imagined single plasmid (initial copy number of 10), we consider its representation (in  
 100 terms of its presence in cells) after a number of periods, with conjugation both disabled (left-hand  
 101 panel) and enabled (right-hand panel). If conjugation is disabled, then plasmids are essentially  
 102 rapidly "flushed" from the system, as they are not transferred vertically. However, if we *enable*  
 103 conjugation in our simulation, then plasmids are retained for longer within the system, suggesting  
 104 that conjugation offers an important mechanism for stabilising a system long enough for switchable  
 105 computations to occur. For details on the simulation of conjugation, please see [25] and the Methods  
 106 section of the current paper.

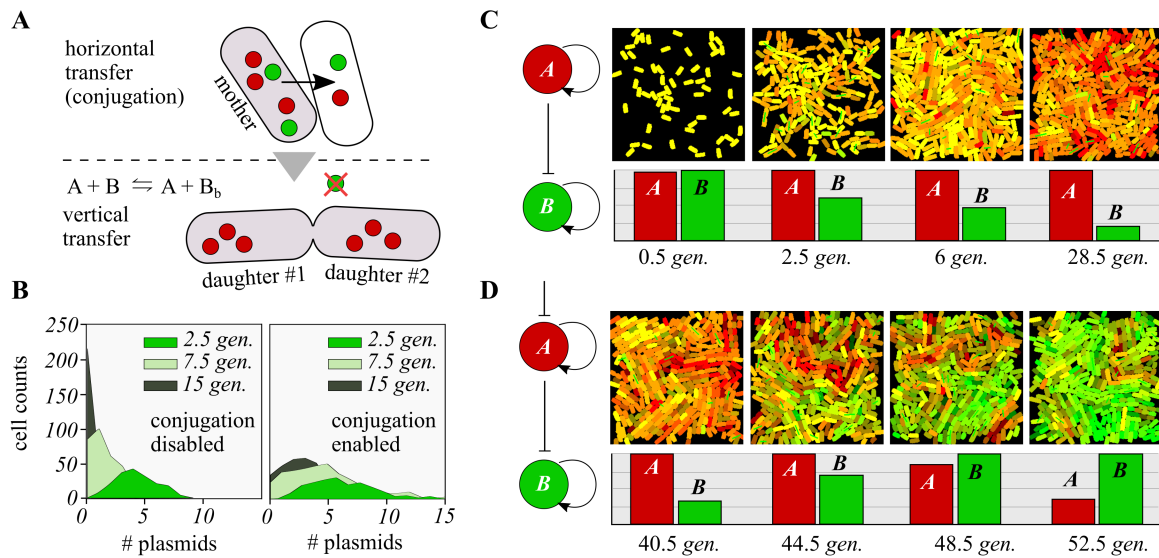

**Figure 2.** Switchable control of plasmid copy number through horizontal (conjugation) and vertical gene transfer. **A.** A basic principle guides the following theoretical model: plasmids whose replication is being repressed will not be spread through vertical transfer (i.e. mother to daughters) but can still be *copied* within siblings via horizontal transfer. **B.** Distributions representing the number of plasmids in individual cells across a population. The rate of plasmid loss (when its replication is being repressed) is much faster when conjugation is disabled i.e. plasmids are not transferred horizontally. This suggests that conjugation is a powerful tool for stabilizing the systems long enough to allow for switchable computations. **C.** Simulation of a population where all cells start with two plasmids, A and B. The overall number of B plasmids (bar plots) decreases over time, since its replication is repressed by A. **D.** Same simulation as in C but the replication of plasmid A can be externally repressed. This repression over A happens after when the overall number of plasmids B is very low (but not zero). As a result, the scenario is reversed and it is plasmid B which predominates over A. Time in all plots is measured in generations (*gen.*) - details on the simulation of conjugation in Methods.

107 In Figure 2C we show the results of spatially-explicit simulations of our system, in which  
 108 plasmid A represses the replication of plasmid B. Both plasmids start off at roughly equal numbers,  
 109 but we see that the red plasmid A rapidly dominates the population.

110 We then show (Figure 2D) how the system may be "switched", such that an alternative  
 111 computational task is selected for the population. Replication of plasmid A is repressed by an external

112 signal, which leads to both a gradual loss of the red plasmid A, and an increase in the representation  
113 of the green plasmid B (since its replication is no longer being repressed by plasmid A). If we remove  
114 the external signal repressing plasmid A, then the system will gradually switch back to a dominant  
115 “red” state, and this process is indefinitely repeatable.

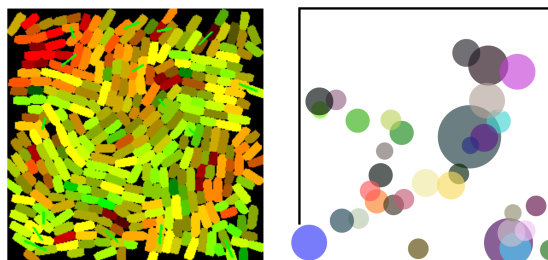

**Figure 3.** Plasmid copy numbers are not homogeneously distributed across a population, but highly clustered. Dots in the right-hand plot show the positions of those cells with more of plasmid B (green) in the simulation snapshot shown to the left. There is one dot per cell with high B concentration; the colour of dots is meaningless; diameter of dots are directly proportional to the plasmid copy number in each cell. Some dots are perfectly aligned, which suggest vertical transfer, while groups of cells (for example, in the bottom right) increased the copy number via conjugation.

116 The spatially-explicit nature of our simulation means that it is possible to analyse further the  
117 distribution of plasmids in the system. In Figure 3 we show a snapshot of a simulation in which  
118 plasmid B (green) predominates. We see that the distribution of plasmid B is certainly not uniform,  
119 and observe clusters that are suggestive of both vertical and horizontal transfer. This clustering  
120 is responsible for stabilising the simulation, compared to the situation shown in Figure 1B (i.e.,  
121 parameter values do not need to be unique). Clusters essentially act like plasmid *reservoirs* and  
122 generate non-linear dynamics around overall plasmid copy number, which favours robustness. In  
123 addition, these clusters add a different viewpoint to the analysis of bacterial differentiation within a  
124 population [26] - often a knowledge gap - which is advantageous to us.

### 125 *Distributed computations using cell consortia*

126 An important recent development in synthetic biology and biocomputing has been the  
127 development of *computational consortia*; that is, computations that are *distributed* over a number of  
128 different cells, each of which performs a specific role [27–29]. This approach potentially allows for  
129 much more *scalable* cellular computation, as a large and potentially complex circuit may be broken  
130 down into smaller communicating components, each of which is placed in a specific cell. A common  
131 structure involves “sender” and “receiver” bacterial strains, each of which either transmit or act upon  
132 specific signals, and we adopt that model here.

133 In Figure 4 we depict our scheme for multi-cellular computation of the Boolean NOR function,  
134 using four cell strains that interact to evaluate the gate. Recall that NOR is a negated OR function,  
135 so it returns “1” only when *both* of its inputs are zero, and “0” in all other cases (usefully, NOR is a  
136 *universal gate*, which means that any other Boolean function may be constructed using it).



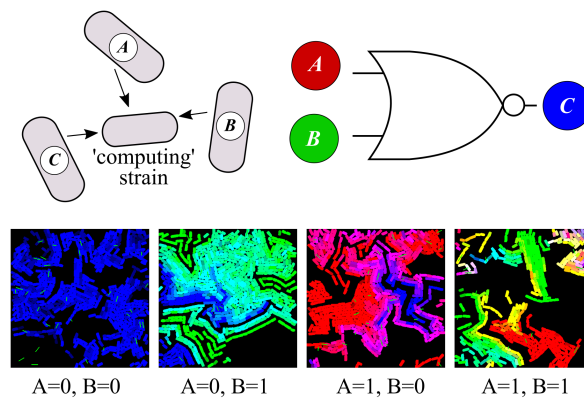

**Figure 4.** Multicellular computation in a 4-strain consortia. A different approach is adopted to design a 3-plasmid system that responds to a NOR logic function: both input plasmids A and B repress the replication of output plasmid C. We have one strain per plasmid, plus another *computing strain* - the input/output strains are able to transfer plasmids horizontally to the computing strain but cannot receive plasmids from others. Simulations of the four logic cases highlight the spatial localization of the computation. Only the computing strain is shown - black spaces in-between correspond to different “sender” strains.

137 Our system is composed of three plasmids; A (red) and B (green) represent the *inputs* to the NOR  
138 gate, and plasmid C (which defaults to blue) representing *output=1*. Both A and B repress the output  
139 plasmid C, so C is only present (corresponding to an output value of “1”) if *both* A and B are absent  
140 (i.e., both input values are equal to zero). Each plasmid is represented by its own bacterial strain (the  
141 input plasmids in the “sender” strains), and we also use a fourth “computing” (or “receiver”) strain,  
142 which is engineered to express the appropriate fluorescent protein, according to the plasmid that it  
143 receives.

144 We show the results of simulations for each of the four input cases (00, 01, 10 and 11); in the  
145 first case, we see only blue cells, as that is the only situation in which we can expect to see an output  
146 value of 1. In the other cases, we see a preponderance of green (where the B input dominates), red  
147 (where the A input dominates), or a mixture (where both input plasmids are represented equally).  
148 This confirms the in-principle possibility of engineering plasmid copy numbers for the purposes of  
149 distributed cellular computation.

150 *Use casing the potential of task switching.*

151 We developed two simple models to demonstrate the potential of the suggested strategy (Figure  
152 5). There are two different approaches to the use of task switching: (1) switch between two completely  
153 *different* tasks, and (2) repurpose the *meaning* of the inputs to the *same* task.

154 In the population simulated in Figure 5A, two plasmids coexist, each encoding an different  
155 inducible promoter with a fluorescent reporter downstream (red for plasmid A, green for plasmid B).  
156 These two tasks are different in that they respond to different input signals (*s1* and *s2* respectively).  
157 Depending on which task *runs* at a given time, the cells will be sensing the corresponding signal.  
158 Therefore, this approach allows us to encode different tasks (e.g., biosensors) that will be active on  
159 demand. Figure 5A shows the performance of the simulation over 50 generations. Plasmids A are  
160 predominant until  $t = 40$ , when they are externally repressed; as a result, plasmids B take their place.  
161 Simultaneously, the two input signals are changed over time; note that values 0 and 1 indicate their  
162 absolute absence and their saturation, respectively. We see that during the first 40 generations, only  
163 the dynamics of signal *s1* are captured by the population, while signal *s2* is ignored or captured at  
164 residual levels. The reverse situation occurs from  $t = 40$  onwards, when only signal *s2* is sensed.

165 The repurposing of the device (i.e., the same implementation, but different functions) is  
 166 illustrated in Figure 5B, by changing the effects of the input on the circuit. Similar tasks as before  
 167 coexist in a population, where both plasmids express a reporter. In this example, there is only one  
 168 input signal, which is an inducer for the circuit in plasmid A and a repressor for that of plasmid B. By  
 169 changing the *meaning* of inputs, the computation returns a different output. The simulated population  
 170 reads the signal as an inducer until  $t = 40$ , when plasmid A is externally repressed. From then on,  
 171 plasmids B will be present in higher copy numbers, and the same signal will be read as a repressor.

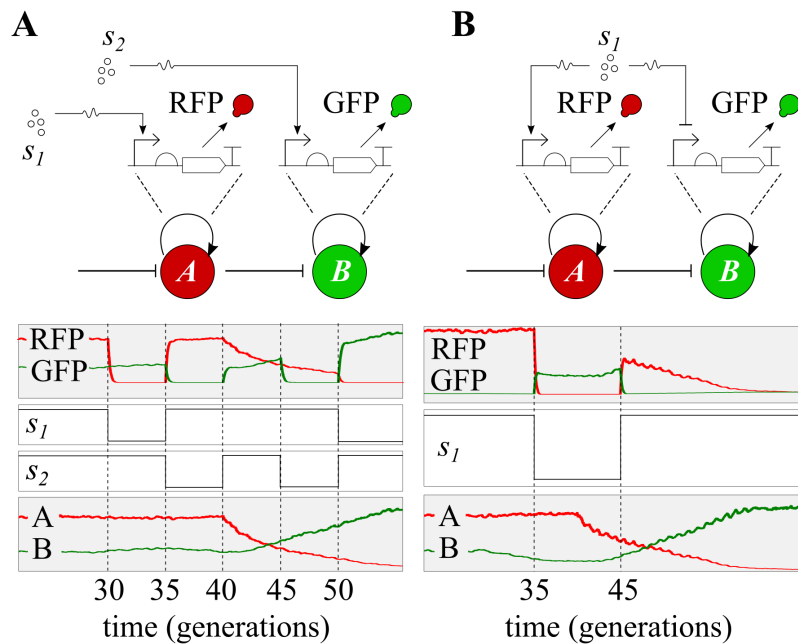

**Figure 5.** Usecasing the potential of multitasking. **A.** Reduction of cellular workload. Two input signals,  $s_1$  and  $s_2$ , trigger the expression of different circuits - in this case a simple reporter gene. By controlling plasmid copy number, the population reacts to one of either two input signals. Cells will not have both circuits at the same time, thus reducing the metabolic cost. **B.** Repurposing input signals. One input,  $s_1$ , acts as an inducer for the circuit in plasmid A and a repressor for the circuit in plasmid B. Multitasking control allows for switching the population from using  $s_1$  as an inducer to using  $s_2$  as an inhibitor (and vice-versa).

#### 172 4. Materials and Methods

##### 173 *Differential models*

174 Ordinary Differential Equations (ODEs) were used to perform deterministic simulations of  
 175 plasmid dynamics in the non-spatial (Figure 1) and spatial (Figure 5) scenarios. The first set of ODEs  
 176 describe the reactions  $A + B \xrightarrow{k_2} A$  and  $B \xrightarrow{k_1} 2 \cdot B$ :

$$\frac{dA}{dt} = 0 \quad (1)$$

$$\frac{dB}{dt} = k_1 \cdot B - k_2 \cdot A \cdot B \quad (2)$$

177 where plasmid A is constant,  $k_1 = 0.05$ ,  $k_2 = 0.005$ , and initial conditions are  $A = B = 100$  (all units  
 178 dimensionless). Equilibrium is found at  $k_1/k_2 = 100$  (Figure 1).

179 The circuits of Figure 5 were also simulated deterministically. Both models run inside cells of a  
 180 spatial, discrete simulation. The set of ODEs that govern the performance of the first circuit (Figure  
 181 5A) is:

$$\frac{dpA}{dt} = k_2 \cdot pA^a - k_1 \cdot s_1 \cdot pA \quad (3)$$

$$\frac{dpB}{dt} = k_2 \cdot pB^a - k_1 \cdot s_2 \cdot pB \quad (4)$$

$$\frac{ds_1}{dt} = k_2 \cdot pA^a - k_1 \cdot s_1 \cdot pA \quad (5)$$

$$\frac{dA^a}{dt} = -k_2 \cdot pA^a + k_1 \cdot s_1 \cdot pA \quad (6)$$

$$\frac{dRFP}{dt} = k_3 \cdot pA^a - k_4 \cdot RFP \quad (7)$$

$$\frac{ds_2}{dt} = k_2 \cdot pB^a - k_1 \cdot s_2 \cdot pB \quad (8)$$

$$\frac{dpB^a}{dt} = -k_2 \cdot pB^a + k_1 \cdot s_2 \cdot pB \quad (9)$$

$$\frac{dGFP}{dt} = k_3 \cdot pB^a - k_4 \cdot GFP \quad (10)$$

182 where  $pA$  and  $pB$  are the promoter in plasmids A and B, respectively,  $k_1 = 1$  is the rate of binding  
 183 of the signals to their cognate promoters in either plasmid, denoted by  $pA^b$  or  $pB^b$ ,  $k_2 = 50$  rates the  
 184 reversed reaction (unbinding) back to  $pA$  or  $pB$ ,  $k_3 = 200$  is the expression (merged transcription and  
 185 translation) of the target gene in each plasmid, and  $k_4 = 1$  the degradation of the proteins GFP and  
 186 RFP. The number of plasmids A and B is determined by the discrete simulation.

187 The circuit in Figure 5B was based on the same equations as above, but with the following  
 188 changes: signal  $s_2$  is removed from the system, signal  $s_1$  inhibits B and GFP is expressed from  $pB$   
 189 rather than  $pB^a$ . Therefore, equations 5 and 10 change into:

$$\frac{ds_1}{dt} = k_2 \cdot pA^a - k_1 \cdot s_1 \cdot pA - k_1' \cdot s_1 \cdot k_2 \cdot pB^a \quad (11)$$

$$\frac{dGFP}{dt} = k_3 \cdot pB - k_4 \cdot GFP \quad (12)$$

190 where  $k_1' = 30$ , which is the rate of repression of  $pB$  by signal  $s_1$ . All rates are expressed in molecules  
 191 and hours, following values commonly used in mathematical models [30,31]. In any case, signals  $s_1$   
 192 and  $s_2$  are abundant or absent, therefore their derivatives can be considered null.

### 193 Stochastic models

194 Gillespie's algorithm [32] was used to calculate the intracellular performance of plasmid stability  
 195 in Figures 2-4. In Figures 2-3 the reactions simulated were  $A + B \xrightarrow{k_b} A + B^b$  and its reversed  $A + B \xleftarrow{k_u}$   
 196  $A + B^b$ , where  $k_b$  is the rate of plasmid A to block the replication of B, and  $k_u$  is the rate of unblocking  
 197 such repression. Their values are 1 and 0.5 respectively.

198 Figure 4 includes a third plasmid, C to perform a NOR logic function. The reactions for this  
 199 simulation are:  $A + C \xrightarrow{k_b} A + C^b$ ,  $A + C \xleftarrow{k_u} A + C^b$ ,  $B + C \xrightarrow{k_b} B + C^b$  and  $B + C \xleftarrow{k_u} B + C^b$ .



## 200 *Spatial simulations*

201 For spatially-explicit simulations we used the agent-based tool DiSCUS [25]. This platform has  
202 previously been used to study the spread and growth of bacterial populations [33], and has been  
203 included in design-build-test synthetic biology life cycles [34]. In DiSCUS, a population of rod-shaped  
204 cells grows on a 2D surface. Each cell was coded to run a copy of either the stochastic or deterministic  
205 simulation under study. The spatial simulation resolved plasmid loss due to vertical transfer and  
206 plasmid gain due to horizontal transfer. After each division and conjugation event, plasmid copy  
207 numbers were updated, and the intracellular simulations adjusted the final numbers of *repressed*  
208 elements accordingly.

209 Time was measured in theoretical doubling-times, what we called *generations* (Figure 2), which  
210 is the time it takes for a rod-shaped body to grow and divide in DiSCUS. During each conjugation  
211 event, 2 or 3 (random) plasmids are transferred. Conjugation frequencies were fitted to experimental  
212 observations (see [25] for details). DiSCUS implements the probability that a cell will conjugate with  
213 a neighbour cell at any time-point during its lifetime (probabilities range from 0.001 to 0.05). This  
214 parameter was fitted to frequencies obtained experimentally, both in liquid cultures [35] and on 2D  
215 surfaces [36].

## 216 5. Discussion and conclusions

217 The engineering of increasingly complex tasks (i.e., genetic circuits) in cells is a major challenge,  
218 and a very active research topic. However, the design of management strategies for the execution of  
219 these tasks has received relatively little attention. Computer science, commonly used to frame the  
220 development of genetic circuits, has successfully achieved strategies to this end that can be of use to  
221 synthetic biology. Here, we present a *task switching* method in bacteria as a way of managing cellular  
222 resources.

223 Task switching is designed by controlling plasmid copy number (CN). Since each plasmid  
224 will encode for a specific task, the control of CN will result in the population *running* one task or  
225 another, without the need to re-design and re-engineer the cells. As envisioned here, this control  
226 is achieved via transcription factors [23]; that is, by making plasmid replication dependent on a  
227 repressor (for instance, using the LacI repressor to inhibit the replication of a replicon modified with  
228 the LacI operator (LacO)). The control of the repressor-operator interplay (e.g. fine-tuning the level of  
229 repressor or the noise patterns [37]) can avoid a situation that ends in plasmid loss. We use Horizontal  
230 Gene Transfer (HGT) as a tool to solve this issue. According to our simulations, HGT generates  
231 plasmid *reservoirs* that restore the equilibrium to an otherwise collapsing (i.e., inevitable plasmid  
232 loss) scenario. Another possibility would be to engineer a second replicon, corresponding to low  
233 CN, on the plasmids. This way, plasmids will never be completely lost. Nevertheless, the potential  
234 control mechanisms over HGT [38] means that it lends itself to both single-strain and multicellular  
235 computations based on this approach.

236 Plasmids and HGT may play a major role in interbacterial relationships and the evolution of  
237 microbial communities [39]. Such powerful tools should not be left out of the synthetic biology  
238 toolbox. This study demonstrates the in-principle feasibility of using them to achieve complex  
239 human-defined computations in cellular systems, and provides baseline information for their future  
240 wet-lab implementation.

241 **Acknowledgments:** The work of AG-M is supported by the SynBio3D (UK-EP SRC-EP/R019002/1) project of  
242 the UK Engineering and Physical Sciences Research Council and the BioRoboost (EU-H2020-BIOTEC-820699)  
243 Contract of the European Union. The work of AR-P is supported by the Spanish TIN2016-81079-R, (MINECO  
244 AEI/FEDER, EU) and Madrid Gov. project B2017/BMD-3691, InGEMICS-CM (FSE/FEDER, EU). Work in FdIC  
245 laboratory was financed by grant BFU2017-86378-P from the Ministry of Science and Technology (Spain).

246 **Author Contributions:** AG-M, FdIC, AR-P and MA conceived the study and contributed to paper writing. AG-M  
247 set up the computational framework and performed all simulations.

248 **Conflicts of Interest:** The authors declare no conflict of interest.

## 249 References

- 250 1. Amos, M.; Goni-Moreno, A. Cellular computing and synthetic biology. In *Computational Matter*; Stepney,  
251 S.; Rasmussen, S.; Amos, M., Eds.; Springer, 2018; pp. 93–110.
- 252 2. Church, G.M.; Elowitz, M.B.; Smolke, C.D.; Voigt, C.A.; Weiss, R. Realizing the potential of synthetic  
253 biology. *Nature Reviews Molecular Cell Biology* **2014**, *15*, 289.
- 254 3. Ro, D.K.; Paradise, E.M.; Ouellet, M.; Fisher, K.J.; Newman, K.L.; Ndungu, J.M.; Ho, K.A.; Eachus, R.A.;  
255 Ham, T.S.; Kirby, J.; others. Production of the antimalarial drug precursor artemisinic acid in engineered  
256 yeast. *Nature* **2006**, *440*, 940.
- 257 4. Kim, H.J.; Jeong, H.; Lee, S.J. Synthetic biology for microbial heavy metal biosensors. *Analytical and*  
258 *Bioanalytical Chemistry* **2018**, pp. 1–13.
- 259 5. Selvester, R.H.; Collier, C.R.; Pearson, R.B. Analog computer model of the vectorcardiogram. *Circulation*  
260 **1965**, *31*, 45–53.
- 261 6. Heinmets, F. Analog computer analysis of a model-system for the induced enzyme synthesis. *Journal of*  
262 *Theoretical Biology* **1964**, *6*, 60–75.
- 263 7. Wintle, B.C.; Boehm, C.R.; Rhodes, C.; Molloy, J.C.; Millett, P.; Adam, L.; Breitling, R.; Carlson, R.;  
264 Casagrande, R.; Dando, M.; others. Point of View: A transatlantic perspective on 20 emerging issues  
265 in biological engineering. *Elife* **2017**, *6*, e30247.
- 266 8. Amos, M., Ed. *Cellular Computing*; Oxford University Press, 2004.
- 267 9. Manzoni, R.; Urrios, A.; Velazquez-Garcia, S.; de Nadal, E.; Posas, F. Synthetic biology: insights into  
268 biological computation. *Integrative Biology* **2016**, *8*, 518–532.
- 269 10. Benenson, Y. Biomolecular computing systems: principles, progress and potential. *Nat. Rev. Genet.* **2012**,  
270 *13*, 455–468.
- 271 11. Bonnet, J.; Yin, P.; Ortiz, M.E.; Subsoontorn, P.; Endy, D. Amplifying genetic logic gates. *Science* **2013**,  
272 *340*, 599–603.
- 273 12. Nielsen, A.A.; Der, B.S.; Shin, J.; Vaidyanathan, P.; Paralanov, V.; Strychalski, E.A.; Ross, D.; Densmore,  
274 D.; Voigt, C.A. Genetic circuit design automation. *Science* **2016**, *352*, aac7341.
- 275 13. Lou, C.; Liu, X.; Ni, M.; Huang, Y.; Huang, Q.; Huang, L.; Jiang, L.; Lu, D.; Wang, M.; Liu, C.; Chen, D.;  
276 Chen, C.; Chen, X.; Yang, L.; Ma, H.; Chen, J.; Ouyang, Q. Synthesizing a novel genetic sequential logic  
277 circuit: a push-on push-off switch. *Molecular Systems Biology* **2010**, *6*.
- 278 14. Purcell, O.; Savery, N.J.; Grierson, C.S.; di Bernardo, M. A comparative analysis of synthetic genetic  
279 oscillators. *J. R. Soc. Interface* **2010**, *7*, 1503–24.
- 280 15. Friedland, A.E.; Lu, T.K.; Wang, X.; Shi, D.; Church, G.; Collins, J.J. Synthetic gene networks that count.  
281 *Science* **2009**, *324*, 1199–1202.
- 282 16. Funnell, B.E.; Phillips, G.J. *Plasmid Biology*; Vol. 672, ASM Press, 2004.
- 283 17. Smillie, C.; Garcillán-Barcia, M.P.; Francia, M.V.; Rocha, E.P.; de la Cruz, F. Mobility of plasmids.  
284 *Microbiology and Molecular Biology Reviews* **2010**, *74*, 434–452.
- 285 18. Martínez-García, E.; Aparicio, T.; Goñi-Moreno, A.; Fraile, S.; de Lorenzo, V. SEVA 2.0: an update of the  
286 Standard European Vector Architecture for de-/re-construction of bacterial functionalities. *Nucleic Acids*  
287 *Research* **2014**, *43*, D1183–D1189.
- 288 19. Llosa, M.; Gomis-Rüth, F.X.; Coll, M.; Cruz, F.d.l. Bacterial conjugation: a two-step mechanism for DNA  
289 transport. *Molecular Microbiology* **2002**, *45*, 1–8.
- 290 20. Tatum, E.; Lederberg, J. Gene recombination in the bacterium *Escherichia coli*. *Journal of Bacteriology* **1947**,  
291 *53*, 673.
- 292 21. Goñi-Moreno, A.; Amos, M.; de la Cruz, F. Multicellular computing using conjugation for wiring. *PLoS*  
293 *ONE* **2013**, *8*, e65986.
- 294 22. Goñi-Moreno, A.; Amos, M. A reconfigurable NAND/NOR genetic logic gate. *BMC Systems Biology* **2012**,  
295 *6*, 126.
- 296 23. Gil, D.; Bouché, J.P. ColE1-type vectors with fully repressible replication. *Gene* **1991**, *105*, 17–22.
- 297 24. Friehs, K. Plasmid copy number and plasmid stability. In *New Trends and Developments in Biochemical*  
298 *Engineering*; Scheper, T., Ed.; Springer Berlin Heidelberg, 2004; Vol. 86, *Advances in Biochemical Engineering*,  
299 pp. 47–82.

- 300 25. Goni-Moreno, A.; Amos, M. DiSCUS: a simulation platform for conjugation computing. *International*  
301 *Conference on Unconventional Computation and Natural Computation*. Springer, 2015, pp. 181–191.
- 302 26. García-Betancur, J.C.; Goñi-Moreno, A.; Horger, T.; Schott, M.; Sharan, M.; Eikmeier, J.; Wohlmuth, B.;  
303 Zernecke, A.; Ohlsen, K.; Kuttler, C.; others. Cell differentiation defines acute and chronic infection cell  
304 types in *Staphylococcus aureus*. *Elife* **2017**, *6*, e28023.
- 305 27. Goñi-Moreno, A.; Redondo-Nieto, M.; Arroyo, F.; Castellanos, J. Biocircuit design through engineering  
306 bacterial logic gates. *Natural Computing* **2011**, *10*, 119–127.
- 307 28. Regot, S.; Macia, J.; Conde, N.; Furukawa, K.; Kjellén, J.; Peeters, T.; Hohmann, S.; de Nadal, E.; Posas,  
308 F.; Solé, R. Distributed biological computation with multicellular engineered networks. *Nature* **2011**,  
309 *469*, 207.
- 310 29. Macía, J.; Posas, F.; Solé, R.V. Distributed computation: the new wave of synthetic biology devices. *Trends*  
311 *in Biotechnology* **2012**, *30*, 342–349.
- 312 30. Miró-Bueno, J.M.; Rodríguez-Patón, A. A simple negative interaction in the positive transcriptional  
313 feedback of a single gene is sufficient to produce reliable oscillations. *PloS One* **2011**, *6*, e27414.
- 314 31. Goni-Moreno, A.; Amos, M. Model for a population-based microbial oscillator. *BioSystems* **2011**,  
315 *105*, 286–294.
- 316 32. Gillespie, D.T. Exact stochastic simulation of coupled chemical reactions. *The Journal of Physical Chemistry*  
317 **1977**, *81*, 2340–2361.
- 318 33. Espeso, D.R.; Martínez-García, E.; de Lorenzo, V.; Goñi-Moreno, Á. Physical forces shape group identity  
319 of swimming *Pseudomonas putida* cells. *Frontiers in Microbiology* **2016**, *7*, 1437.
- 320 34. Goñi-Moreno, A.; Carcajona, M.; Kim, J.; Martínez-García, E.; Amos, M.; de Lorenzo, V. An  
321 implementation-focused bio/algorithmic workflow for synthetic biology. *ACS Synthetic Biology* **2016**,  
322 *5*, 1127–1135.
- 323 35. del Campo, I.; Ruiz, R.; Cuevas, A.; Revilla, C.; Vielva, L.; de la Cruz, F. Determination of conjugation  
324 rates on solid surfaces. *Plasmid* **2012**, *67*, 174–182.
- 325 36. Seoane, J.; Yankelevich, T.; Dechesne, A.; Merkey, B.; Sternberg, C.; Smets, B.F. An individual-based  
326 approach to explain plasmid invasion in bacterial populations. *FEMS Microbiology Ecology* **2011**, *75*, 17–27.
- 327 37. Goñi-Moreno, A.; Benedetti, I.; Kim, J.; de Lorenzo, V. Deconvolution of gene expression noise into spatial  
328 dynamics of transcription factor–promoter interplay. *ACS Synthetic Biology* **2017**, *6*, 1359–1369.
- 329 38. Zatyka, M.; Thomas, C.M. Control of genes for conjugative transfer of plasmids and other mobile  
330 elements. *FEMS Microbiology Reviews* **1998**, *21*, 291–319.
- 331 39. van de Guchte, M. Horizontal gene transfer and ecosystem function dynamics. *Trends in Microbiology*  
332 **2017**, *25*, 699–700.
